# Supplementary material
Source: ML conference proceedings conference paper supplement (https://proceedings.neurips.cc/paper_files/paper/2007/hash/cf004fdc76fa1a4f25f62e0eb5261ca3-Abstract.html)
Supplement: Supplementary file 1 [file cf004fdc76fa1a4f25f62e0eb5261ca3-Supplemental.zip]

# Comparing Bayesian models for multisensory cue combination without mandatory integration

Ulrik R. Beierholm, Konrad Körding, Ladan Shams & Wei Ji Ma

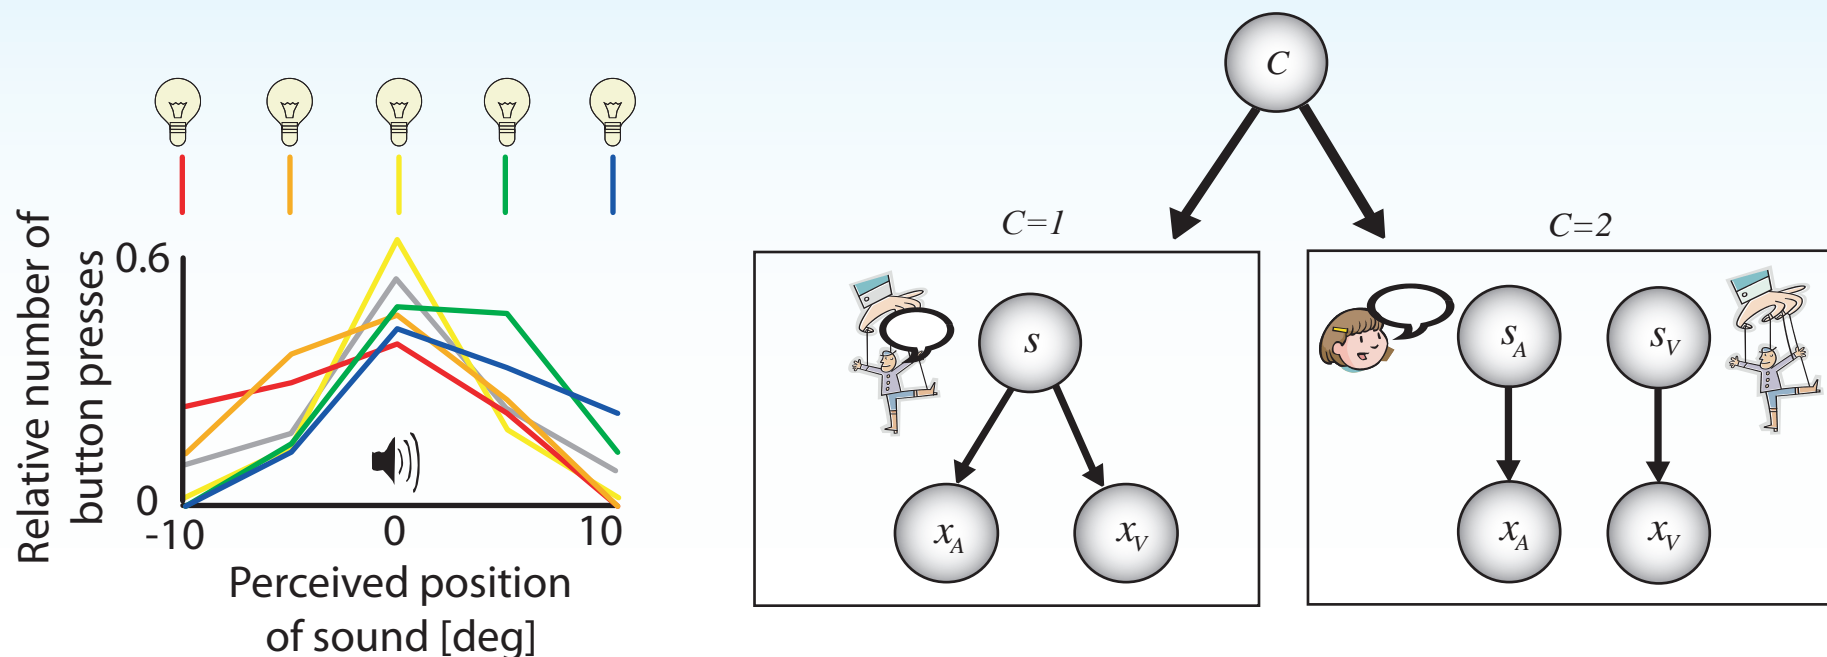

Does the human brain optimally estimate the underlying causal structure when perceiving multisensory stimuli?
